# Supplementary material for: Surface charge modification for improvement of photocatalytic H2 production over a La2Ti2O7/graphene nanocomposite
Source: Royal Society of Chemistry journal article supplement (doi:10.1039/c4ra10522b), 2014-01-01
Supplement: c4ra10522b1.pdf [file c4ra10522b1.pdf]

## *Electronic Supporting Information*

### **Surface charge modification in improvement of photocatalytic H<sub>2</sub> production over La<sub>2</sub>Ti<sub>2</sub>O<sub>7</sub>/graphene nanocomposite**

*Sujuan Hu, Bo Chi, \* Jian Pu and Li Jian*

*Center for Fuel Cell Innovation, State Key Laboratory of Materials Processing and  
Die and Mould Technology, School of Materials Science and Engineering, Huazhong  
University of Science and Technology, Wuhan 430074, China*

*\* Corresponding Author. Tel/Fax: + 86 27 87558142; E-mail: [chibo@hust.edu.cn](mailto:chibo@hust.edu.cn)*

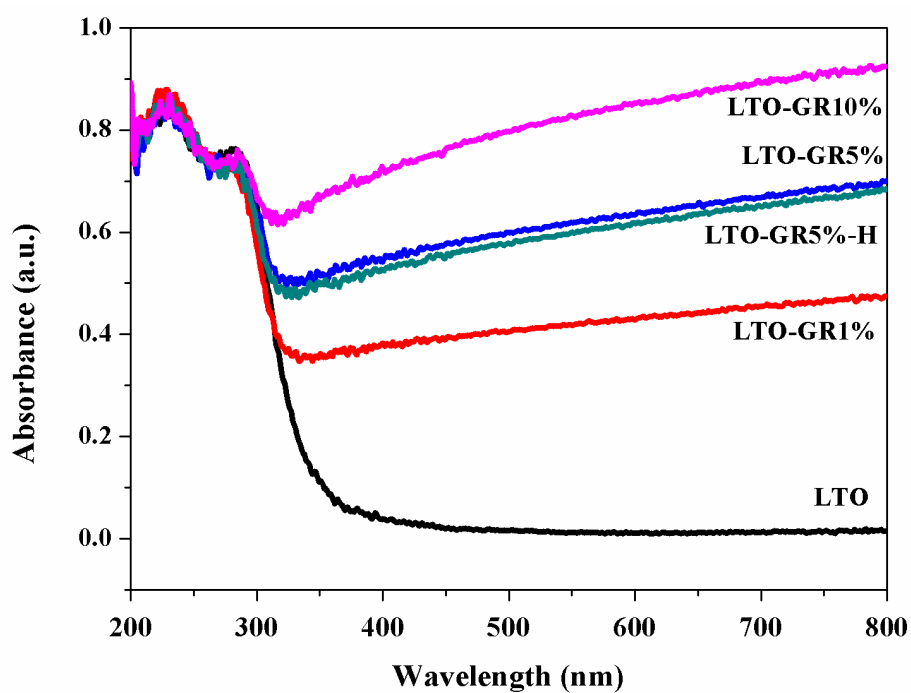

**Fig. S1** UV-vis diffuse reflectance spectra (DRS) of pure LTO, LTO/GR-H and LTO/GR nanocomposites with different weight addition ratios of GR.

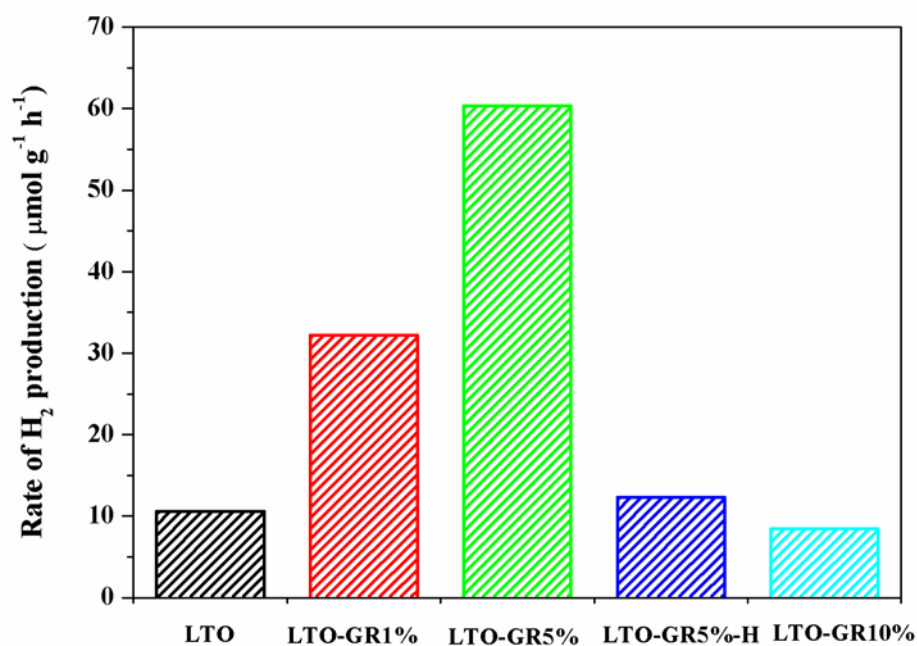

**Fig. S2** Effect of LTO, LTO/GR-H and LTO/GR nanocomposites with different weight addition ratios of GR on the photocatalytic H<sub>2</sub> evolution rates under 500 W Xe lamp irradiation.

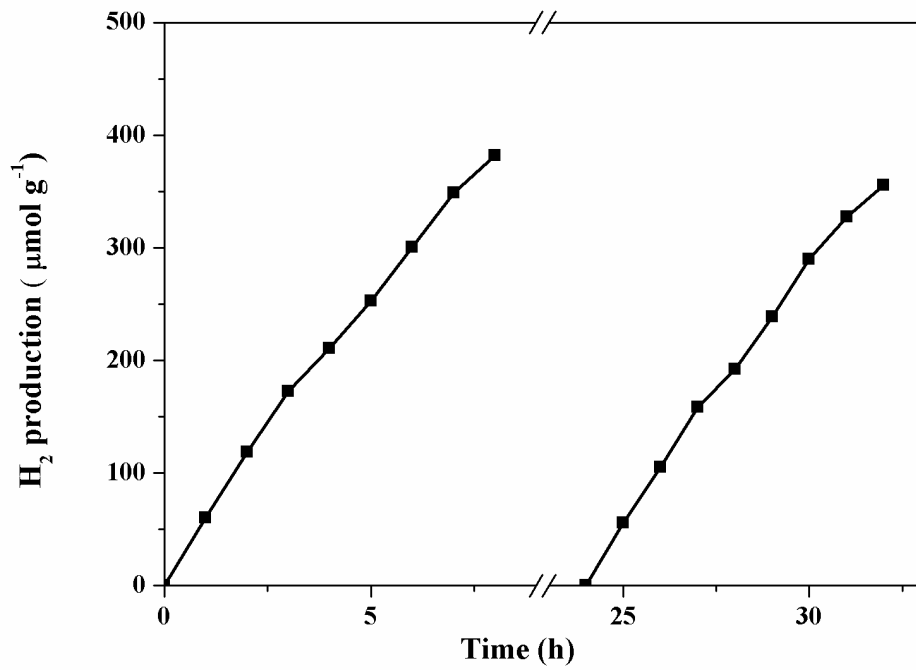

**Fig. S3** Time courses of photocatalytic H<sub>2</sub> production over LTO/GR.
